# Supplementary material
Source: PubMed Central journal article supplement (PMC2642739)

**Supplementary Figure 1.** A monoclonal antibody specific for hSPE-39. Lysates of HeLa cells either transfected or not transfected with the hSPE-39-EGFP construct were resolved by PAGE, blotted and probed with the anti-hSPE-39 monoclonal antibody. Endogenous hSPE-39 is indicated with a hollow arrow. Full-length hSPE-39-EGFP fusion protein is indicated with a filled arrow. hSPE-39-EGFP is partially degraded when over expressed in HeLa cells and degraded products of various sizes were also detected. Sizes of protein standards are shown in kilodaltons.

**Supplementary Figure 2.** An antiserum that recognizes mammalian VPS33B. Human Embryonic Kidney (HEK) 293 cells were either transfected or not transfected with the *hVPS33B-HA* construct before they were analyzed by immunoblotting. The anti-VPS33B antiserum detected a single major endogenous band. Migration of this band (top arrow) is indistinguishable from the band detected by the anti-HA antibody in HEK cells expressing hVPS33B-HA (bottom arrow). This indicates that the endogenous hVPS33B band was the correct size. Sizes of protein standards are shown in kilodaltons.

**Supplementary Figure 3.** hSPE-39 interacts with hVPS33B in HEK 293T cells. HEK cells transfected (lanes 3, 4, 7, 8, 11 and 12) and not transfected (lanes 1, 2, 5, 6, 9 and 10) with hSPE-39-EGFP were incubated with (even lanes) or without (odd lanes) DSP, lysed and immunoprecipitated with antibodies against the  $\gamma$  subunit of adaptor complex AP-1 (lanes 1-4) or hSPE-39 (lanes 5-8). Anti-hSPE-39 antibodies precipitated both (arrows) endogenous hSPE-39 (lanes 5, 6, 7 and 8) and transfected hSPE-39-EGFP (lanes 7 and 8) together with the HOPS subunit hVPS33B. hSPE-39 or hVPS33B was not detected in beads coated with anti- $\gamma$ -antibody (lanes 1-4). Bands marked with an asterisk

in lanes 1-4 are the heavy chain of the anti- $\gamma$  antibody. Each input was loaded at 2% of the total amount of cell lysate used for corresponding immunoprecipitation experiments.

**Supplementary Figure 4.** Co-immunoprecipitation of hSPE-39-HA with recombinant HOPS subunits. (A) HEK cell lines expressing tagged HOPS subunits were transiently transfected with hSPE39-HA and incubated with (even lanes) or without (odd lanes) DSP. Cell lysates were immunoprecipitated with anti-hSPE-39 antibodies. As we observed before with the hSPE39-EGFP fusion protein, the HA tagged form of hSPE-39 co-precipitates VPS11-HA (lanes 1 and 2), VPS16-HA (lanes 3 and 4), VPS18-MYC (lanes 5 and 6) and VPS41-MYC (lanes 7 and 8). (B) Lysates of cells expressing hSPE-39-HA/VPS18-MYC (lanes 1 and 2) or hSPE-39-HA/VPS41-MYC (lanes 3 and 4) were immunoprecipitated with anti-MYC antibodies and the presence of hSPE-39-HA in the precipitated protein complexes was detected by Western analysis. These results indicate that, like hSPE-39-EGFP, hSPE-39-HA also interacts with the HOPS subunits. Each input was loaded at 1.7% of the total amount of cell lysate used for corresponding immunoprecipitation experiments.

**Supplementary Figure 5.** Golgi, endosomal and lysosomal markers in cells overexpressing hSPE-39-EGFP. HeLa cells transfected with the hSPE-39-EGFP construct were stained for EEA1 (A), transferrin receptor (D), CD63 (G), LAMP1 (J), GM130 (M), and cathepsin D (P). Each row consists of corresponding images that show immunostaining of a compartment marker (in red, left panels), hSPE-39-EGFP signals (in green, middle panels) and a merge (right panels). Bars, 20  $\mu$ m.

**Supplementary Figure 6.** hSPE-39 knockdown phenotypes can be rescued by siRNA-resistant (SR) hSPE-39-EGFP expression. (A) HeLa cells treated with control siRNAs

(lanes 1, 3 and 4) or *hSPE-39* siRNA (lanes 2, 5 and 6) were transfected with either control vector plasmid pEGFP-N1 (lanes 1 and 2), wild-type (lanes 3 and 5) or siRNA-resistant (lanes 4 and 6) *hSPE-39-EGFP* construct. Western results indicate that the *hSPE-39* siRNA duplex abolished the expression of both endogenous hSPE-39 (lanes 2, 5 and 6) and wild-type hSPE-39-EGFP (lane 5) expression but did not interfere with the expression of hSPE-39-EGFP(SR) (lane 6). (B and C) HeLa cells transfected with both *hSPE-39* siRNA and *hSPE-39-EGFP(SR)* construct were stained for cathepsin D (B) and M6PR (C). Cathepsin D levels are low in cells treated with hSPE-39 knockdown, but its level is increased with hSPE-39-EGFP expression (B). In *hSPE-39* siRNA-treated cells, M6PR signals are highly clustered, which can be corrected by an appropriate level of hSPE-39-EGFP (C). These results indicate that the observed RNAi phenotypes in cultured cells are not off-target effects and that low, physiological level of hSPE-39-EGFP expression can functionally compensate for the lack of endogenous hSPE-39. Bars, 10  $\mu$ m.

**Supplementary Figure S7. hSPE-39 co-localizes with RAB11 and RAB7**

compartments. HEK293 cells stably expressing VPS16-HA either alone (A-C and G-L) or transiently transfected with a plasmid encoding a GFP-tagged RAB5 GTPase mutant Q79L (D-F) were co-stained with antibodies against endogenous hSPE-39, RAB5 and the HA epitope (A-C); hSPE-39 and the HA epitope (D-F), hSPE-39, RAB7B and the HA epitope (G-I); and hSPE-39, RAB11 and the HA epitope (J-L). M shows a representative HEK293 cell transiently transfected with Hrs-MYC and stained with antibodies against hSPE-39 and the MYC epitope. All images were acquired by wide field deconvolution microscopy and pseudo-colored green and red. Bars, 5  $\mu$ m

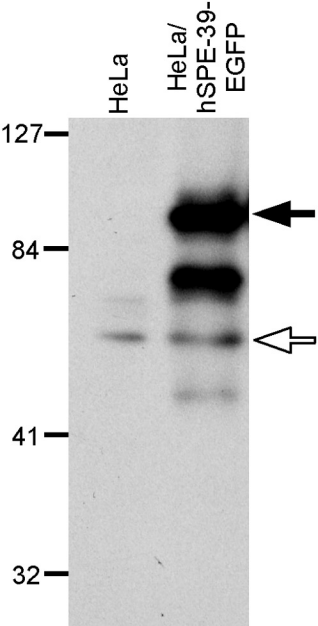

IB: HA

IB: VPS33B

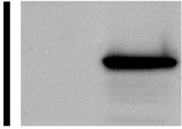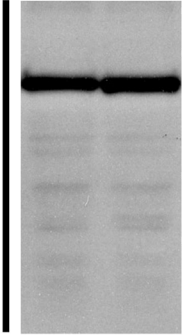

HEK

HEKJ

hVPS33B-HA

131

87

42

32

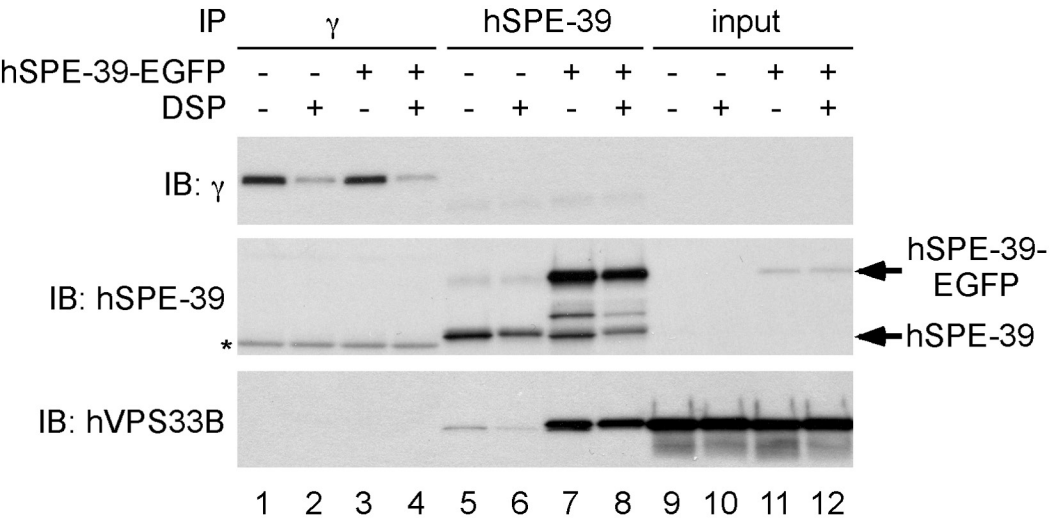

**A**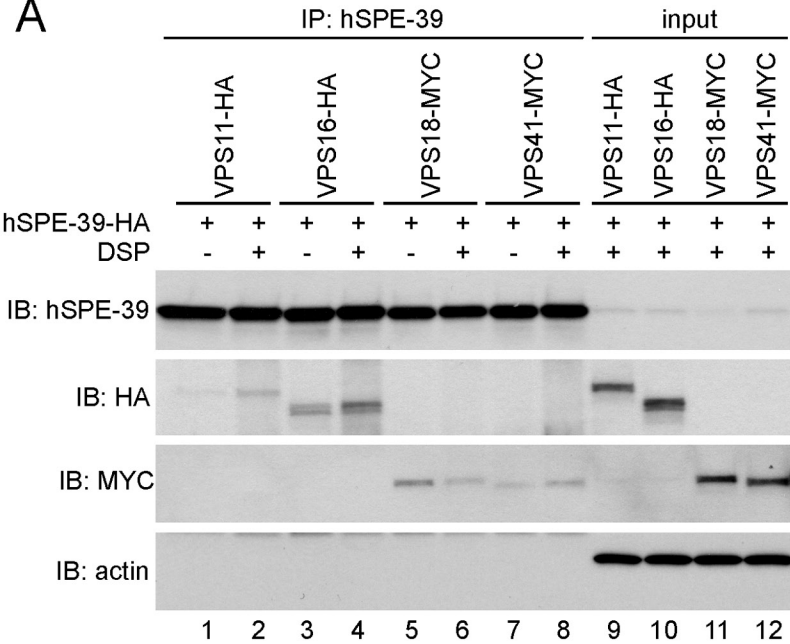**B**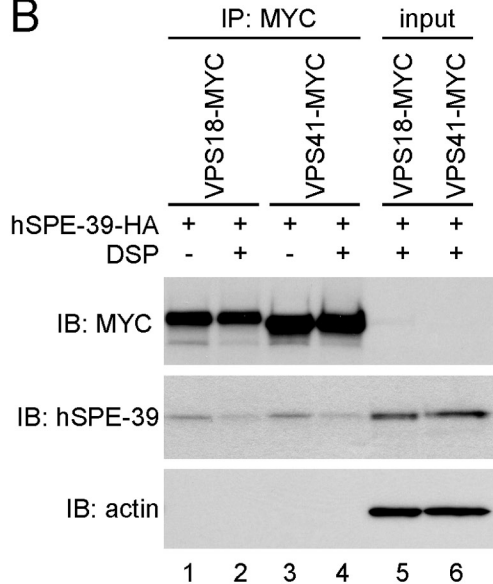

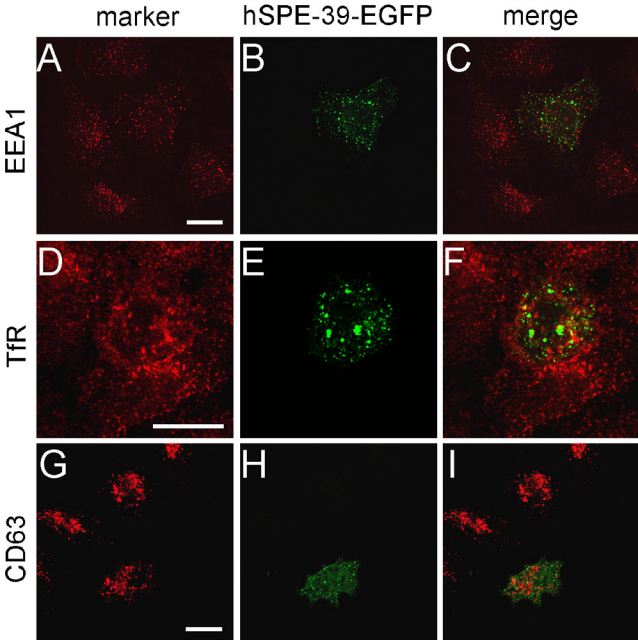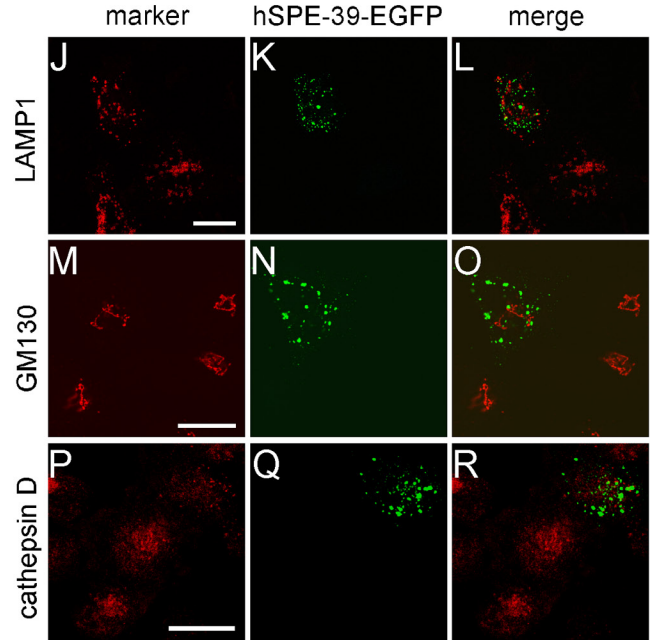



**A**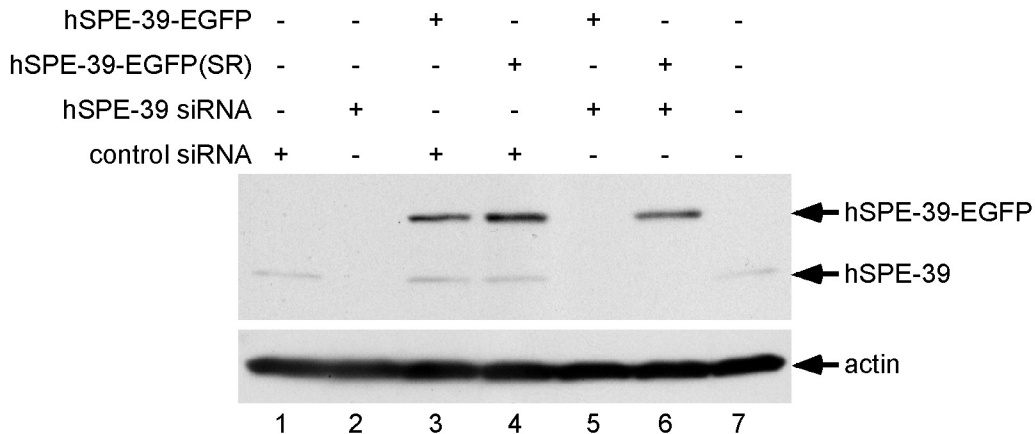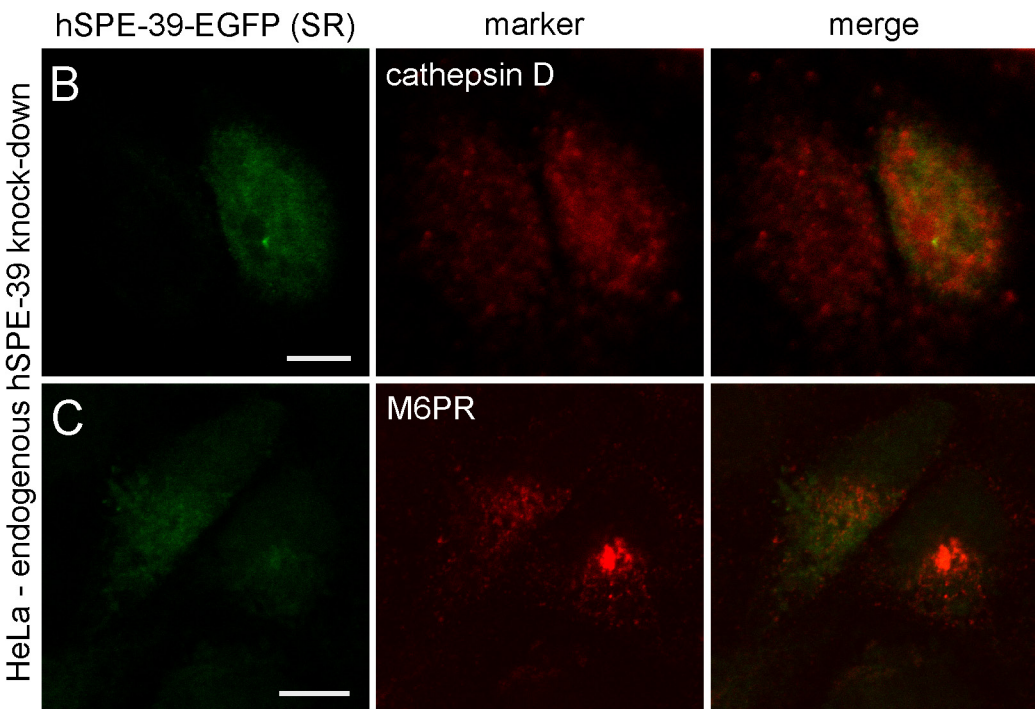

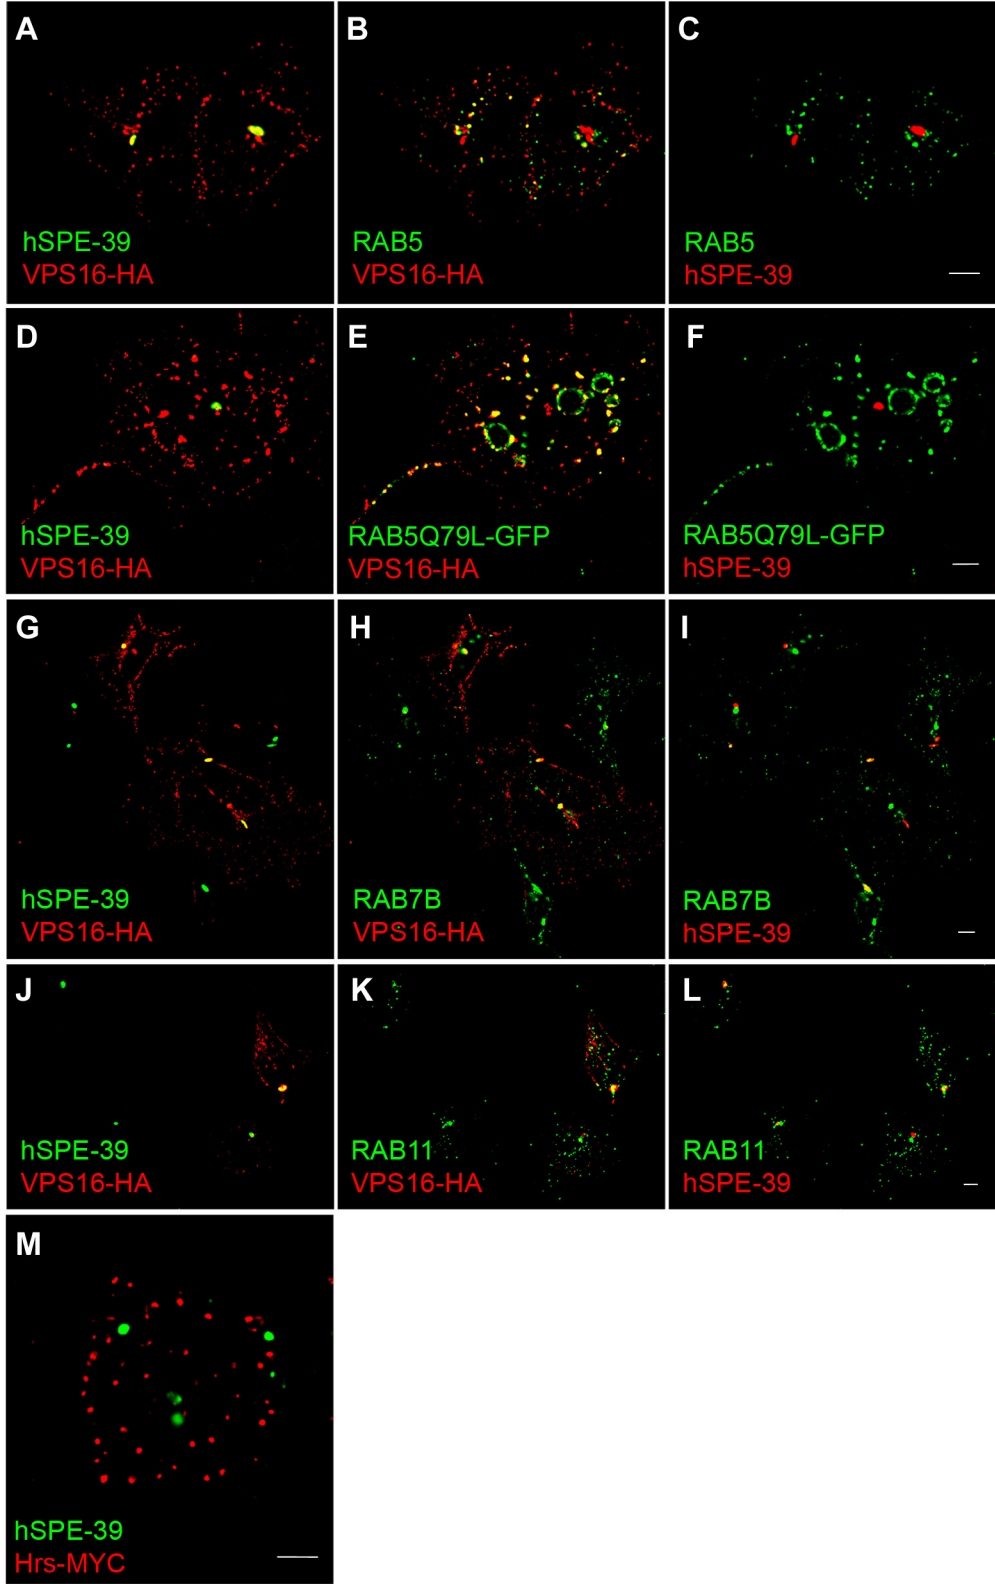

Supplement: E08-07-0728_1.pdf [file E08-07-0728_1.pdf]
